# Supplementary material
Source: Research Square preprint supplement (doi:10.21203/rs.3.rs-8744197/v1)
Supplement: Supplementary file 1 [file 4356602297a28e2530127879.docx]

### Supplementary material 1.

Distance from human locality, road nerwork, CIIT (Corredor Interoceánico del Istmo de Tehuantepec), Maya train, and Protected Areas (PAS) to localities with occurrence records of Leishmania mexicana and Trypanosoma spp. The distance categories refer to: human locality and road network; locality and road network: 0–2, 2–5 and >5 km; CIIT: 0–200, 200–600 and >600 km; Maya train: 0–300, 300–900 and >900 km; PAS: 0–10, 10–40 and >40 km.

| **Study** | **Patógeno** | **Locality** | **Road network** | **CIIT** | **Maya train** | **PAS** |
| --- | --- | --- | --- | --- | --- | --- |
| **E1** | *Trypanosoma cruzi* | |  |  |  |  |
|  | 0–2 km | 0.8 | 0.014 |  |  |  |
|  | 10–40 km |  |  |  |  | 10.3 |
|  | 200–600 km |  |  | 357.2 |  |  |
|  | 300–900 km |  |  |  | 769.0 |  |
| **E2** | *Trypanosoma cruzi* | |  |  |  |  |
|  | 0–2 km |  | 0.1 |  |  |  |
|  | 2–5 km | 3.2 |  |  |  |  |
|  | 0–10 km |  |  |  |  | 4.7 |
|  | 200–600 km |  |  | 370.7 |  |  |
|  | 300–900 km |  |  |  | 781.1 |  |
| **E2** | *Trypanosoma cruzi* | |  |  |  |  |
|  | 0–2 km |  | 0.1 |  |  |  |
|  | 2–5 km | 3.2 |  |  |  |  |
|  | 0–10 km |  |  |  |  | 4.7 |
|  | 200–600 km |  |  | 370.7 |  |  |
|  | 300–900 km |  |  |  | 781.1 |  |
| **E2** | *Trypanosoma cruzi* | |  |  |  |  |
|  | 0–2 km | 1.4 | 1.2 |  |  |  |
|  | 0–10 km |  |  |  |  | 0 |
|  | 200–600 km |  |  | 360.8 |  |  |
|  | 300–900 km |  |  |  | 770.8 |  |
| **E2** | *Trypanosoma cruzi* | |  |  |  |  |
|  | 0–2 km |  | 0.1 |  |  |  |
|  | 2–5 km | 3.2 |  |  |  |  |
|  | 0–10 km |  |  |  |  | 4.6 |
|  | 200–600 km |  |  | 370.7 |  |  |
|  | 300–900 km |  |  |  | 781.3 |  |
| **E2** | *Trypanosoma cruzi* | |  |  |  |  |
|  | 0–2 km |  | 0.1 |  |  |  |
|  | 2–5 km | 3.2 |  |  |  |  |
|  | 0–10 km |  |  |  |  | 4.7 |
|  | 200–600 km |  |  | 370.7 |  |  |
|  | 300–900 km |  |  |  | 781.1 |  |
| **E2** | *Trypanosoma cruzi* | |  |  |  |  |
|  | 0–2 km | 1.4 | 1.2 |  |  |  |
|  | 0–10 km |  |  |  |  | 0 |
|  | 200–600 km |  |  | 360.8 |  |  |
|  | 300–900 km |  |  |  | 770.8 |  |
| **E3** | *Trypanosoma cruzi* | |  |  |  |  |
|  | 2–5 km | 3.7 | 2.1 |  |  |  |
|  | >40 km |  |  |  |  | 47.0 |
|  | 0–300 km |  |  |  | 38.9 |  |
|  | 200–600 km |  |  | 549.3 |  |  |
| **E4** | *Trypanosoma cruzi* | |  |  |  |  |
|  | 0–2 km | 1.1 | 1.1 |  |  |  |
|  | 0–10 km |  |  |  |  | 4.3 |
|  | 0–300 km |  |  |  | 35.1 |  |
|  | 200–600 km |  |  | 460.4 |  |  |
| **E5** | *Leishmania mexicana* | |  |  |  |  |
|  | 0–2 km | 0.5 | 0.2 |  |  |  |
|  | >40 km |  |  |  |  | 63.3 |
|  | 0–200 km |  |  | 65.4 |  |  |
|  | 0–300 km |  |  |  | 112.9 |  |
| **E5** | *Leishmania mexicana* | |  |  |  |  |
|  | 0–2 km | 1.0 | 0.013 |  |  |  |
|  | >40 km |  |  |  |  | 62.6 |
|  | 0–200 km |  |  | 54.9 |  |  |
|  | 0–300 km |  |  |  | 123.5 |  |
| **E5** | *Leishmania mexicana* | |  |  |  |  |
|  | 0–2 km | 1.0 | 0.3 |  |  |  |
|  | 10–40 km |  |  |  |  | 22.9 |
|  | 0–200 km |  |  | 139.6 |  |  |
|  | 0–300 km |  |  |  | 38.9 |  |
| **E5** | *Leishmania mexicana* | |  |  |  |  |
|  | 0–2 km | 0.7 | 0.4 |  |  |  |
|  | 10–40 km |  |  |  |  | 29.7 |
|  | 0–200 km |  |  | 128.8 |  |  |
|  | 0–300 km |  |  |  | 52.1 |  |
| **E5** | *Leishmania mexicana* | |  |  |  |  |
|  | 0–2 km | 1.5 | 0.017 |  |  |  |
|  | 10–40 km |  |  |  |  | 10.1 |
|  | 0–200 km |  |  | 79.0 |  |  |
|  | 0–300 km |  |  |  | 164.7 |  |
| **E5** | *Leishmania mexicana* | |  |  |  |  |
|  | 0–2 km | 0.9 | 0.03 |  |  |  |
|  | 10–40 km |  |  |  |  | 18.3 |
|  | 0–200 km |  |  | 99.4 |  |  |
|  | 0–300 km |  |  |  | 103.4 |  |
| **E5** | *Leishmania mexicana* | |  |  |  |  |
|  | 0–2 km | 1.0 | 1.0 |  |  |  |
|  | >40 km |  |  |  |  | 42.4 |
|  | 0–200 km |  |  | 89.2 |  |  |
|  | 0–300 km |  |  |  | 156.6 |  |
| **E5** | *Leishmania mexicana* | |  |  |  |  |
|  | 0–2 km | 0.5 | 0.1 |  |  |  |
|  | 10–40 km |  |  |  |  | 38.1 |
|  | 0–200 km |  |  | 81.7 |  |  |
|  | 0–300 km |  |  |  | 122.5 |  |
| **E5** | *Leishmania mexicana* | |  |  |  |  |
|  | 0–2 km | 0.8 | 0.7 |  |  |  |
|  | >40 km |  |  |  |  | 48.0 |
|  | 0–200 km |  |  | 73.6 |  |  |
|  | 0–300 km |  |  |  | 146.4 |  |
| **E5** | *Leishmania mexicana* | |  |  |  |  |
|  | 0–2 km | 1.5 | 1.0 |  |  |  |
|  | >40 km |  |  |  |  | 57.8 |
|  | 0–200 km |  |  | 75.9 |  |  |
|  | 0–300 km |  |  |  | 102.1 |  |
| **E5** | *Leishmania mexicana* | |  |  |  |  |
|  | 0–2 km | 0.8 | 0.2 |  |  |  |
|  | 10–40 km |  |  |  |  | 16.7 |
|  | >600 km |  |  | 879.3 |  |  |
|  | >900 km |  |  |  | 1284.6 |  |
| **E6** | *Leishmania mexicana* | |  |  |  |  |
|  | >5 km | 15.6 | 21.0 |  |  |  |
|  | 0–10 km |  |  |  |  | 0 |
|  | 0–300 km |  |  |  | 123.9 |  |
|  | 200–600 km |  |  | 296.1 |  |  |
| **E6** | *Trypanosoma* sp. | |  |  |  |  |
|  | >5 km | 15.6 | 21.0 |  |  |  |
|  | 0–10 km |  |  |  |  | 0 |
|  | 0–300 km |  |  |  | 123.9 |  |
|  | 200–600 km |  |  | 296.1 |  |  |
| **E6** | *Leishmania mexicana* | |  |  |  |  |
|  | 0–2 km | 0.3 | 0.5 |  |  |  |
|  | 0–10 km |  |  |  |  | 0 |
|  | 0–200 km |  |  | 0 |  |  |
|  | 300–900 km |  |  |  | 353.5 |  |
| **E6** | *Leishmania mexicana* | |  |  |  |  |
|  | 0–2 km | 1.2 | 0.5 |  |  |  |
|  | 0–10 km |  |  |  |  | 0 |
|  | 0–200 km |  |  | 0 |  |  |
|  | 300–900 km |  |  |  | 350.2 |  |
| **E6** | *Trypanosoma cruzi* | |  |  |  |  |
|  | 0–2 km | 1.7 | 0.4 |  |  |  |
|  | 0–10 km |  |  |  |  | 2.5 |
|  | 0–300 km |  |  |  | 0.9 |  |
|  | 200–600 km |  |  | 426.2 |  |  |
| **E9** | *Trypanosoma cruzi* | |  |  |  |  |
|  | 0–2 km | 1.9 | 1.0 |  |  |  |
|  | 10–40 km |  |  |  |  | 18.3 |
|  | 0–300 km |  |  |  | 55.2 |  |
|  | >600 km |  |  | 699.7 |  |  |
| **E10** | *Trypanosoma cruzi* | |  |  |  |  |
|  | 0–2 km | 1.2 | 0.5 |  |  |  |
|  | 0–10 km |  |  |  |  | 0 |
|  | 0–200 km |  |  | 0 |  |  |
|  | 300–900 km |  |  |  | 350.2 |  |
| **E11** | *Trypanosoma cruzi* TcI | |  |  |  |  |
|  | 0–2 km | 0.8 | 0.02 |  |  |  |
|  | 0–10 km |  |  |  |  | 4.9 |
|  | 0–200 km |  |  | 86.0 |  |  |
|  | 0–300 km |  |  |  | 156.1 |  |
| **E12** | *Trypanosoma cruzi* TcI | |  |  |  |  |
|  | 0–2 km | 1.3 | 0.7 |  |  |  |
|  | >40 km |  |  |  |  | 86.9 |
|  | 0–300 km |  |  |  | 0 |  |
|  | >600 km |  |  | 619.3 |  |  |
| **E12** | *Trypanosoma dionisii* | |  |  |  |  |
|  | 0–2 km | 1.3 | 0.7 |  |  |  |
|  | >40 km |  |  |  |  | 86.9 |
|  | 0–300 km |  |  |  | 0 |  |
|  | >600 km |  |  | 619.3 |  |  |
| **E12** | *Trypanosoma* sp. | |  |  |  |  |
|  | 0–2 km | 1.3 | 0.7 |  |  |  |
|  | >40 km |  |  |  |  | 86.9 |
|  | 0–300 km |  |  |  | 0 |  |
|  | >600 km |  |  | 619.3 |  |  |
| **E13** | *Trypanosoma cruzi* | |  |  |  |  |
|  | 0–2 km | 0.3 | 0.5 |  |  |  |
|  | 0–10 km |  |  |  |  | 0 |
|  | 0–200 km |  |  | 0 |  |  |
|  | 300–900 km |  |  |  | 353.5 |  |
| **E13** | *Trypanosoma cruzi* | |  |  |  |  |
|  | 0–2 km | 0.3 | 0.5 |  |  |  |
|  | 0–10 km |  |  |  |  | 0 |
|  | 0–200 km |  |  | 0 |  |  |
|  | 300–900 km |  |  |  | 353.5 |  |
| **E13** | *Trypanosoma cruzi* | |  |  |  |  |
|  | 2–5 km | 3.5 | 2.6 |  |  |  |
|  | >40 km |  |  |  |  | 53.1 |
|  | 0–200 km |  |  | 88.0 |  |  |
|  | 0–300 km |  |  |  | 171.4 |  |
| **E13** | *Trypanosoma cruzi* | |  |  |  |  |
|  | 0–2 km | 1.5 | 1.3 |  |  |  |
|  | 0–10 km |  |  |  |  | 0 |
|  | 0–300 km |  |  |  | 32.2 |  |
|  | 200–600 km |  |  | 266.7 |  |  |
| **E13** | *Trypanosoma cruzi* | |  |  |  |  |
|  | 0–2 km | 1.9 | 0.6 |  |  |  |
|  | >40 km |  |  |  |  | 45.6 |
|  | 0–200 km |  |  | 118.3 |  |  |
|  | 0–300 km |  |  |  | 59.7 |  |
| **E13** | *Trypanosoma cruzi* | |  |  |  |  |
|  | 0–2 km | 1.4 | 0.5 |  |  |  |
|  | >40 km |  |  |  |  | 43.9 |
|  | 0–200 km |  |  | 81.0 |  |  |
|  | 0–300 km |  |  |  | 151.2 |  |
| **E13** | *Trypanosoma cruzi* | |  |  |  |  |
|  | 0–2 km | 1.6 | 0.5 |  |  |  |
|  | >40 km |  |  |  |  | 59.9 |
|  | 0–200 km |  |  | 23.3 |  |  |
|  | 0–300 km |  |  |  | 155.2 |  |
| **E13** | *Trypanosoma cruzi* | |  |  |  |  |
|  | 0–2 km | 1.0 | 1.0 |  |  |  |
|  | >40 km |  |  |  |  |  |
|  | 0–200 km |  |  | 89.2 |  |  |
|  | 0–300 km |  |  |  | 156.6 | 42.3 |
| **E13** | *Trypanosoma cruzi* | |  |  |  |  |
|  | 0–2 km | 1.0 | 0.1 |  |  |  |
|  | >40 km |  |  |  |  | 62.6 |
|  | 0–200 km |  |  | 54.8 |  |  |
|  | 0–300 km |  |  |  | 123.5 |  |
| **E13** | *Trypanosoma cruzi* | |  |  |  |  |
|  | 0–2 km | 0.6 | 0.3 |  |  |  |
|  | 0–10 km |  |  |  |  | 2.6 |
|  | 0–200 km |  |  | 171.4 |  |  |
|  | 0–300 km |  |  |  | 9.2 |  |
| **E13** | *Trypanosoma cruzi* | |  |  |  |  |
|  | 0–2 km | 0.6 | 0.3 |  |  |  |
|  | 0–10 km |  |  |  |  | 2.6 |
|  | 0–200 km |  |  | 171.4 |  |  |
|  | 0–300 km |  |  |  | 9.2 |  |
| **E13** | *Trypanosoma cruzi* | |  |  |  |  |
|  | 0–2 km | 0.8 | 0.6 |  |  |  |
|  | 10–40 km |  |  |  |  | 29.7 |
|  | 0–200 km |  |  | 140.3 |  |  |
|  | 0–300 km |  |  |  | 41.3 |  |
| **E13** | *Trypanosoma cruzi* | |  |  |  |  |
|  | 0–2 km | 0.7 | 0.4 |  |  |  |
|  | 10–40 km |  |  |  |  | 29.7 |
|  | 0–200 km |  |  | 128.8 |  |  |
|  | 0–300 km |  |  |  | 52.1 |  |
| **E13** | *Trypanosoma cruzi* | |  |  |  |  |
|  | 0–2 km | 0.7 | 0.4 |  |  |  |
|  | 10–40 km |  |  |  |  | 29.7 |
|  | 0–200 km |  |  | 128.8 |  |  |
|  | 0–300 km |  |  |  | 52.1 |  |
| **E13** | *Trypanosoma cruzi* | |  |  |  |  |
|  | 0–2 km | 0.9 | 0.1 |  |  |  |
|  | >40 km |  |  |  |  | 62.6 |
|  | 0–200 km |  |  | 54.8 |  |  |
|  | 0–300 km |  |  |  | 123.5 |  |
| **E13** | *Trypanosoma cruzi* | |  |  |  |  |
|  | 2–5 km | 2.3 | 2.1 |  |  |  |
|  | 10–40 km |  |  |  |  | 29.7 |
|  | 0–300 km |  |  |  | 13.6 |  |
|  | 200–600 km |  |  | 291.8 |  |  |
| **E13** | *Trypanosoma cruzi* | |  |  |  |  |
|  | 0–2 km | 0.4 | 0.4 |  |  |  |
|  | 10–40 km |  |  |  |  | 21.0 |
|  | 0–300 km |  |  |  | 0.3 |  |
|  | 200–600 km |  |  | 323.1 |  |  |
| **E13** | *Trypanosoma cruzi* | |  |  |  |  |
|  | 0–2 km | 0.7 | 0.4 |  |  |  |
|  | 10–40 km |  |  |  |  |  |
|  | 200–600 km |  |  | 474.1 |  |  |
|  | 300–900 km |  |  |  |  | 851.9 |
| **E13** | *Trypanosoma cruzi* | |  |  |  |  |
|  | 0–2 km | 0.7 | 0.6 |  |  |  |
|  | 10–40 km |  |  |  |  | 12.6 |
|  | 200–600 km |  |  | 481.0 |  |  |
|  | 300–900 km |  |  |  | 857.2 |  |
| **E13** | *Trypanosoma cruzi* | |  |  |  |  |
|  | 2–5 km | 3.2 | 2.1 |  |  |  |
|  | 0–10 km |  |  |  |  | 5.4 |
|  | >600 km |  |  | 879.1 |  |  |
|  | >900 km |  |  |  | 1141.5 |  |
| **E13** | *Trypanosoma cruzi* | |  |  |  |  |
|  | 0–2 km |  | 1.4 |  |  |  |
|  | 2–5 km | 2.7 |  |  |  |  |
|  | 10–40 km |  |  |  |  | 28.9 |
|  | >600 km |  |  | 924.4 |  |  |
|  | >900 km |  |  |  | 1153.0 |  |
| **E13** | *Trypanosoma cruzi* | |  |  |  |  |
|  | 2–5 km | 4.7 | 4.5 |  |  |  |
|  | >40 km |  |  |  |  | 70.9 |
|  | >600 km |  |  | 973.3 |  |  |
|  | >900 km |  |  |  | 1203.7 |  |
| **E13** | *Trypanosoma cruzi* | |  |  |  |  |
|  | 0–2 km |  | 0.05 |  |  |  |
|  | 2–5 km | 3.0 |  |  |  |  |
|  | 0–10 km |  |  |  |  | 5.7 |
|  | >600 km |  |  | 1002.1 |  |  |
|  | >900 km |  |  |  | 1416.1 |  |
| **E13** | *Trypanosoma cruzi* | |  |  |  |  |
|  | 0–2 km |  | 1.4 |  |  |  |
|  | 2–5 km | 3.0 |  |  |  |  |
|  | 10–40 km |  |  |  |  | 30.7 |
|  | >600 km |  |  | 920.8 |  |  |
|  | >900 km |  |  |  | 1337.4 |  |
